## Acute myocardial infarction in the Covid-19 era: incidence, clinical characteristics and in-hospital outcomes – a multicenter registry

A. Fardman<sup>1</sup>, D. Zahger<sup>2</sup>, K. Orvin<sup>3</sup>, N. Kofman<sup>4</sup>, J. Mohsen<sup>5</sup>, O. Tsafrir<sup>6</sup>, E. Asher<sup>7</sup>, R. Rubinshtein<sup>8</sup>, J. Jamal<sup>9</sup>, R. Efraim<sup>10</sup>, M. Halabi<sup>11</sup>, Y. Shacham<sup>12</sup>, L.H. Fortis<sup>13</sup>, R. Beigel<sup>1</sup>, S. Matetzky<sup>1</sup>

<sup>1</sup>Chaim Sheba Medical Center, Tel Hashomer, Israel; <sup>2</sup>Soroka University Medical Center, Cardiology, Beer Sheva, Israel; <sup>3</sup>Rabin Medical Center, Petah Tikva, Israel; <sup>4</sup>Assaf Harofeh Medical Center, Rishon Lezion, Israel; <sup>5</sup>Hillel Yaffe Medical Center, Hadera, Israel; <sup>6</sup>Nahariya Hospital for the Western Galilee, Nahariya, Israel; <sup>7</sup>Shaare Zedek Medical Center, Jerusalem, Israel; <sup>8</sup>The Edith Wolfson Medical Center, Holon, Israel; <sup>9</sup>Barzilai Medical Center, Ashkelon, Israel; <sup>10</sup>Rambam Health Care Campus, Haifa, Israel; <sup>11</sup>Ziv Medical Center, Tsfat, Israel; <sup>12</sup>Tel Aviv Sourasky Medical Center, Tel Aviv, Israel; <sup>13</sup>Ben Gurion University of the Negev, Beer Sheva, Israel

**Funding Acknowledgement:** Type of funding sources: Private grant(s) and/or Sponsorship. Main funding source(s): This work was supported by a grant from a Fefer foundation for medical research

**Background:** A reduction in acute myocardial infarction (AMI) hospitalizations during the coronavirus pandemic has been previously documented. We aimed to describe the characteristics and in-hospital outcomes of AMI patients during the Covid-19 era compared to a recent previous registry.

**Methods:** We conducted a prospective, multicenter, observational study involving 13 intensive cardiac care units (ICCU) to evaluate consecutive AMI patients admitted throughout an 8-week period during the Covid-19 outbreak. Data were compared to the corresponding period in 2018 using an acute coronary syndrome survey conducted in all ICCUs in Israel. The primary end-point was defined as a composite of sustained ventricular arrhythmia, pulmonary congestion, and/or in-hospital mortality.

**Results:** The study cohort comprised 1466 patients, of whom 774 (53%) were hospitalized during the Covid-19 outbreak. Overall, 841 patients were diagnosed with ST-elevation MI (STEMI): 424 (50.4%) during the Covid-19 era and 417 (49.6%) during the parallel period in 2018. No differences were

detected in the admission rate of patients between the two study periods. STEMI patients admitted during the Covid-19 period tended to have fewer co-morbidities, but a higher Killip class (p value = 0.03). The median time from symptom onset to reperfusion was extended from 180 minutes (IQR 122–292) in 2018 to 290 minutes (IQR 161–1080, p<0.001) in 2020. Hospitalization during the Covid-19 era was independently associated with an increased risk of the combined endpoint of heart failure, malignant arrhythmia, or death in the multivariable logistic regression model (OR 1.63, 95% CI 1.02–2.65, p value = 0.05).

**Conclusion:** While the admission rate of AMI and STEMI in Israel remained similar during both the Covid-19 era and the corresponding period in 2018, total ischemic time extended significantly during the Covid-19 period, which translated into a more severe disease status upon hospital admission, and a higher rate of in-hospital adverse events.
